# Supplementary material for: Dietary Live Yeast Supplementation Influence on Cow’s Milk, Teat and Bedding Microbiota in a Grass-Diet Dairy System
Source: MDPI journal article supplement (doi:10.3390/microorganisms11030673), 2023-03-06
Supplement: s1 [file s1]

**Table S1.** Composition and analytical values of the total mixed rations (TMR).

| TMR                                                                       | C <sup>1</sup> | LY <sup>1</sup> |
|---------------------------------------------------------------------------|----------------|-----------------|
| <b>Ingredients</b> (kg DM/cow/d)                                          |                |                 |
| 1 <sup>st</sup> cut haylage                                               | 6.5            | 6.5             |
| 2 <sup>nd</sup> cut haylage                                               | 3.2            | 3.2             |
| 2 <sup>nd</sup> cut hay                                                   | 7              | 7               |
| Expert Gala Marcenat (energy balanced concentrate)                        | 3.5            | 3.5             |
| Gala Proteine Fromagere C (protein balanced concentrate)                  | 1.8            |                 |
| Gala Proteine Fromagere LY (protein balanced concentrate with live yeast) |                | 1.8             |
| Galaphos Midi Repro (minerals)                                            | 0.18           | 0.18            |
| Analytical values (% DM unless specified otherwise)                       |                |                 |
| DM, %                                                                     | 66.2 ± 5.2     | 62.7 ± 7.5      |
| Crude Protein (CP)                                                        | 14.5 ± 1.3     | 14.5 ± 1.9      |
| Soluble Protein., % CP                                                    | 29.0 ± 3.8     | 31.4 ± 3.6      |
| Fat                                                                       | 1.9 ± 0.3      | 1.6 ± 0.3       |
| Ash                                                                       | 9.0 ± 0.5      | 9.2 ± 1.3       |
| Neutral Detergent Fibre amylase treatment Organic Matter (aNDFom)         | 45.0 ± 3.7     | 44.9 ± 1.6      |
| Neutral Detergent Fibre amylase treatment (aNDF)                          | 47.9 ± 3.5     | 47.8 ± 1.5      |
| Acid Detergent Fibre (ADF)                                                | 33.2 ± 2.7     | 33.5 ± 1.5      |
| Acid Detergent Lignin (ADL)                                               | 5.8 ± 0.5      | 5.4 ± 0.6       |
| Water Soluble Carbohydrate (WSC)                                          | 11.4 ± 0.9     | 11.0 ± 1.0      |
| Starch                                                                    | 1.8 ± 1.8      | 1.8 ± 1.8       |
| Non Fibre Carbohydrate (NFC), %                                           | 28.5 ± 3.0     | 28.7 ± 3.2      |
| Net Energy for Lactation (NEL), Mcal/kg                                   | 1.37 ± 0.05    | 1.35 ± 0.04     |
| Feed Unit for Lactation (UFL), /kg DM*                                    | 0.778 ± 0.03   | 0.767 ± 0.02    |

\* UFL = NEL (kcal/kg) / 1760 (INRA 2018). <sup>1</sup>TMR C = total mixed ration of the control group; TMR LY = total mixed ration of the group receiving the live yeast supplementation.

**Table S2.** Concentrates composition and values.

|                         | Expert Gala Marcenat | Gala Proteine Fromagere |
|-------------------------|----------------------|-------------------------|
| <b>Raw material</b>     |                      |                         |
| Maize                   | 18.21                |                         |
| Wheat                   | 15                   |                         |
| Barley                  | 15                   |                         |
| Fine bran               | 15                   |                         |
| Soybean meal            |                      | 48.5                    |
| Sunflower meal          | 15                   | 3                       |
| Sunflower meal, shelled |                      | 23                      |
| Rape seed meal          | 11.9                 | 23.4                    |

|                                               |       |      |
|-----------------------------------------------|-------|------|
| Cereal seed hulls                             | 5     |      |
| Cane molasses                                 | 2     | 1    |
| Calcium carbonate                             | 1     | 0.15 |
| Oligo-elements, vitamins                      | 0.75  |      |
| Amiviv SE                                     | 0.5   |      |
| Turboviv SE                                   |       | 0.45 |
| Salt                                          | 0.44  |      |
| Biotine                                       | 0.2   |      |
| <b>Nutrients</b>                              |       |      |
| Feed Unit for Lactation (UFL)                 | 0.98  | 0.96 |
| Crude Protein (%)                             | 38.9  | 15.3 |
| Fat (%)                                       | 1.4   | 2.4  |
| Ash (%)                                       | 7     | 6.5  |
| Crude cellulose (%)                           | 11.2  | 9.2  |
| Starch (%)                                    | 3.5   | 34.2 |
| Phosphorus (%)                                | 0.8   | 0.6  |
| Calcium (%)                                   | 0.7   | 0.9  |
| Magnesium (%)                                 | 0.4   | 0.3  |
| Copper (mg/kg)                                | 20.8  | 26   |
| Sulphur (mg/kg)                               | 0.5   | 0.31 |
| Manganese (mg/kg)                             | 92.2  | 158  |
| Iode (mg/kg)                                  | 0.2   | 0.91 |
| Cobalt (mg/kg)                                | 0.6   | 0.4  |
| Selenium (mg/kg)                              | 0.2   | 0.4  |
| Iron (mg/kg)                                  | 292.1 | 207  |
| Zinc (mg/kg)                                  | 115.6 | 196  |
| Ruminally degradable nitrogen (PDIN,<br>g/kg) | 304   | 117  |
| Metabolisable protein supply (PDIE,<br>g/kg)  | 228   | 117  |

**Table S3.** Alpha-diversity indexes calculated from the bacterial profiles in the raw milk and the teat suspensions according to the group (C=control or LY= live yeast) and the period (P1 = before yeast supplementation; P2 = after three month of yeast supplementation; P3 = after four months of supplementation).

|              | Group |      |         |     | Time  |      |      |         |      |
|--------------|-------|------|---------|-----|-------|------|------|---------|------|
|              | C     | Y    | P-value | SEM | P1    | P2   | P3   | P-value | SEM  |
| Milk (n=116) |       |      |         |     |       |      |      |         |      |
| Observed     | 61.9  | 63.6 | 0.7     | 4.2 | 71.7  | 67.6 | 49.0 | <0.001  | 3.5  |
| Shannon      | 2.5   | 2.5  | 0.9     | 0.3 | 2.7   | 2.7  | 2.2  | <0.001  | 0.3  |
| Teat (n=56)  |       |      |         |     |       |      |      |         |      |
| Observed     | 96.7  | 93.1 | 0.4     | 9.5 | 108.4 | 103  | 72   | <0.001  | 6.5  |
| Shannon      | 3.1   | 3.1  | 0.9     | 0.1 | 3.31  | 3.25 | 2.76 | 0.02    | 0.08 |

**Table S4.** *P*-values from PERMANOVA on Bray Curtis and generalized Unifrac indexes of the milk and the teat suspensions according to the group (C=control or LY=live yeast) and to the period (P1 = before yeast supplementation; P2 = after three month of yeast supplementation; P3 = after four months of supplementation).

|                 | Bray Curtis |       | Unifrac |       |
|-----------------|-------------|-------|---------|-------|
|                 | Group       | Time  | Group   | Time  |
| <b>Fungi</b>    |             |       |         |       |
| Milk (n=101)    | 0.07        | 0.001 | 0.05    | 0.001 |
| Teat (n=55)     | <0.01       | 0.001 | <0.01   | 0.001 |
| <b>Bacteria</b> |             |       |         |       |
| Milk (n=116)    | 0.10        | 0.001 | 0.47    | 0.001 |
| Teat (n=56)     | 0.13        | 0.001 | 0.13    | 0.001 |

**Table S5.** Fungal and bacterial Observed and Shannon indexes of individual (a) teat and (b) milk.

| <b>(a) Teat</b> |        |       |          |         |          |         |
|-----------------|--------|-------|----------|---------|----------|---------|
| Cow             | Period | Group | Fungi    |         | Bacteria |         |
|                 |        |       | Observed | Shannon | Observed | Shannon |
| 1624            | P1     | C     | 64       | 3,34    | 98       | 3,19    |
| 3651            | P1     | C     | 19       | 2,49    | 129      | 3,31    |
| 4155            | P1     | C     | 56       | 3,09    | 122      | 3,32    |
| 4601            | P1     | C     | 14       | 2,18    | 89       | 3,14    |
| 4624            | P1     | C     | 58       | 3,35    | 136      | 3,60    |
| 5657            | P1     | C     | 81       | 3,35    | 109      | 3,31    |
| 5683            | P1     | C     | 76       | 3,40    | 132      | 4,11    |
| 5702            | P1     | C     | 20       | 1,89    | 117      | 3,35    |
| 5741            | P1     | C     | 23       | 2,57    | 89       | 3,03    |
| 2158            | P1     | LY    | 64       | 3,46    | 116      | 3,52    |
| 2168            | P1     | LY    | 17       | 0,56    | 123      | 3,53    |
| 2635            | P1     | LY    | 17       | 2,05    | 113      | 3,41    |
| 3180            | P1     | LY    | 16       | 2,03    | 88       | 3,02    |
| 4600            | P1     | LY    | 67       | 3,38    | 107      | 3,11    |
| 5642            | P1     | LY    | 18       | 2,43    | 96       | 3,01    |
| 5681            | P1     | LY    | 39       | 3,17    | 89       | 3,46    |
| 5706            | P1     | LY    | 71       | 3,26    | 109      | 3,24    |
| 5724            | P1     | LY    | 23       | 2,72    | 114      | 3,07    |
| 5732            | P1     | LY    | 27       | 2,70    | 84       | 3,07    |
| 1624            | P2     | C     | 37       | 2,64    | 114      | 3,27    |
| 3651            | P2     | C     | 24       | 1,90    | 87       | 3,04    |
| 4155            | P2     | C     | 60       | 2,84    | 116      | 3,56    |
| 4601            | P2     | C     | 45       | 3,38    | 132      | 3,43    |
| 4624            | P2     | C     | 53       | 2,50    | 129      | 3,93    |
| 5657            | P2     | C     | 29       | 2,67    | 89       | 3,08    |
| 5683            | P2     | C     | 33       | 1,97    | 121      | 3,27    |

|      |    |    |    |      |     |      |
|------|----|----|----|------|-----|------|
| 5702 | P2 | C  | 62 | 1,45 | 100 | 3,38 |
| 5741 | P2 | C  | 55 | 2,36 | 76  | 2,76 |
| 2158 | P2 | LY | 37 | 3,06 | 72  | 3,05 |
| 2168 | P2 | LY | 26 | 1,06 | 85  | 3,30 |
| 2635 | P2 | LY | 42 | 3,05 | 138 | 3,46 |
| 3180 | P2 | LY | 29 | 2,82 | 61  | 2,81 |
| 4600 | P2 | LY | 43 | 2,71 | 111 | 3,31 |
| 5642 | P2 | LY | 18 | 2,00 | 95  | 2,94 |
| 5681 | P2 | LY | 11 | 1,33 | 104 | 3,11 |
| 5706 | P2 | LY | 64 | 2,84 | 91  | 3,34 |
| 5724 | P2 | LY | 70 | 3,31 | 134 | 3,59 |
| 5732 | P2 | LY | 76 | 3,48 | 102 | 3,17 |
| 1624 | P3 | C  | 39 | 1,92 | 87  | 2,89 |
| 3651 | P3 | C  | 48 | 1,54 | 49  | 2,06 |
| 4155 | P3 | C  | 41 | 1,57 | 65  | 2,84 |
| 4601 | P3 | C  | 22 | 1,54 | 82  | 2,73 |
| 4624 | P3 | C  | 42 | 1,57 | 55  | 2,05 |
| 5657 | P3 | C  | 32 | 1,75 | 67  | 2,87 |
| 5683 | P3 | C  | 43 | 1,31 | 49  | 2,33 |
| 5702 | P3 | C  | 33 | 1,82 | 71  | 2,36 |
| 5741 | P3 | C  | 45 | 1,44 | 102 | 3,50 |
| 2158 | P3 | LY | 34 | 2,31 | 71  | 2,80 |
| 2168 | P3 | LY | 26 | 1,16 | 57  | 2,10 |
| 3180 | P3 | LY | 45 | 2,05 | 74  | 3,07 |
| 4600 | P3 | LY | 23 | 1,73 | 55  | 2,99 |
| 5642 | P3 | LY | 44 | 2,46 | 77  | 2,60 |
| 5681 | P3 | LY | 65 | 2,97 | 86  | 3,14 |
| 5706 | P3 | LY | 55 | 2,42 | 67  | 3,24 |
| 5732 | P3 | LY | 57 | 2,14 | 106 | 3,13 |

**(b) Milk**

| Cow  | Period | Group | Fungi    |         | Bacteria |         |
|------|--------|-------|----------|---------|----------|---------|
|      |        |       | Observed | Shannon | Observed | Shannon |
| 1624 | P1     | C     | 17       | 1,99    | 52       | 2,54    |
| 2151 | P1     | C     | 23       | 2,47    | 95       | 3,18    |
| 3157 | P1     | C     | 9        | 1,03    | 99       | 3,55    |
| 3651 | P1     | C     | 24       | 2,37    | 45       | 3,31    |
| 4154 | P1     | C     | 7        | 1,01    | 125      | 3,45    |
| 4155 | P1     | C     | 10       | 1,49    | 68       | 3,05    |
| 4172 | P1     | C     | 9        | 0,83    | 25       | 0,49    |
| 4601 | P1     | C     | 13       | 1,93    | 68       | 2,89    |
| 4624 | P1     | C     | 12       | 1,75    | 84       | 3,20    |
| 5611 | P1     | C     | 9        | 0,61    | 46       | 2,81    |
| 5617 | P1     | C     | 9        | 1,49    | 40       | 1,42    |

|      |    |    |    |      |     |      |
|------|----|----|----|------|-----|------|
| 5657 | P1 | C  | 16 | 2,34 | 58  | 2,64 |
| 5683 | P1 | C  | 10 | 1,08 | 74  | 2,94 |
| 5689 | P1 | C  | 8  | 0,04 | 60  | 2,40 |
| 5693 | P1 | C  | 7  | 0,74 | 80  | 3,04 |
| 5702 | P1 | C  | 4  | 1,03 | 95  | 3,33 |
| 5739 | P1 | C  | 11 | 1,46 | 70  | 2,80 |
| 5741 | P1 | C  | 8  | 1,54 | 87  | 3,12 |
| 2158 | P1 | LY | 18 | 1,87 | 34  | 1,74 |
| 2168 | P1 | LY | 6  | 0,03 | 74  | 2,58 |
| 2635 | P1 | LY | 20 | 2,73 | 77  | 3,02 |
| 3180 | P1 | LY | 10 | 0,92 | 69  | 2,63 |
| 3650 | P1 | LY | 8  | 0,74 | 75  | 2,69 |
| 4160 | P1 | LY | 1  | 0,00 | 49  | 2,24 |
| 4167 | P1 | LY | 11 | 1,47 | 64  | 2,89 |
| 4168 | P1 | LY | 9  | 1,54 | 92  | 2,96 |
| 4600 | P1 | LY | 15 | 2,17 | 87  | 2,98 |
| 5607 | P1 | LY | 3  | 0,39 | 58  | 2,30 |
| 5618 | P1 | LY | 7  | 1,00 | 86  | 2,93 |
| 5635 | P1 | LY | 12 | 2,08 | 93  | 2,94 |
| 5638 | P1 | LY | 18 | 2,02 | 67  | 2,56 |
| 5642 | P1 | LY | 6  | 1,34 | 57  | 1,84 |
| 5681 | P1 | LY | 13 | 1,85 | 66  | 3,40 |
| 5706 | P1 | LY | 17 | 2,43 | 116 | 3,57 |
| 5722 | P1 | LY | 7  | 1,07 | 55  | 2,32 |
| 5724 | P1 | LY | 6  | 1,28 | 89  | 3,18 |
| 5732 | P1 | LY | 11 | 1,86 | 75  | 2,45 |
| 5754 | P1 | LY | 12 | 1,08 | 80  | 3,00 |
| 1624 | P2 | C  | 22 | 1,27 | 51  | 1,33 |
| 2151 | P2 | C  | 17 | 0,63 | 86  | 3,29 |
| 3157 | P2 | C  | 20 | 0,47 | 84  | 3,30 |
| 3651 | P2 | C  | 22 | 1,13 | 51  | 2,19 |
| 4154 | P2 | C  | 15 | 1,15 | 43  | 3,17 |
| 4155 | P2 | C  | 13 | 1,57 | 97  | 2,84 |
| 4172 | P2 | C  | 15 | 1,02 | 79  | 2,84 |
| 4601 | P2 | C  | 20 | 2,17 | 58  | 2,21 |
| 4624 | P2 | C  | 22 | 1,89 | 74  | 2,04 |
| 5611 | P2 | C  | 15 | 1,07 | 93  | 3,39 |
| 5617 | P2 | C  | 1  | 0,00 | 50  | 2,52 |
| 5657 | P2 | C  | 4  | 0,40 | 45  | 1,69 |
| 5683 | P2 | C  | 12 | 1,32 | 57  | 1,15 |
| 5689 | P2 | C  | 15 | 1,60 | 81  | 3,08 |
| 5690 | P2 | C  | 14 | 0,58 | 74  | 3,16 |
| 5702 | P2 | C  | 13 | 1,98 | 78  | 3,26 |
| 5739 | P2 | C  | 3  | 0,87 | 71  | 3,53 |

|      |    |    |    |      |     |      |
|------|----|----|----|------|-----|------|
| 5741 | P2 | C  | 12 | 1,63 | 54  | 2,08 |
| 2158 | P2 | LY | 20 | 1,74 | 54  | 1,75 |
| 2168 | P2 | LY | 16 | 0,89 | 62  | 2,68 |
| 2635 | P2 | LY | 19 | 1,35 | 79  | 2,92 |
| 3180 | P2 | LY | 3  | 0,89 |     |      |
| 3650 | P2 | LY | 12 | 0,53 | 37  | 2,80 |
| 4160 | P2 | LY | 6  | 0,08 | 48  | 1,96 |
| 4167 | P2 | LY | 10 | 1,40 | 86  | 3,28 |
| 4600 | P2 | LY | 13 | 1,33 | 78  | 2,98 |
| 5607 | P2 | LY | 9  | 0,51 | 84  | 3,27 |
| 5618 | P2 | LY | 17 | 1,28 | 61  | 2,33 |
| 5635 | P2 | LY | 16 | 1,04 | 119 | 3,11 |
| 5638 | P2 | LY | 17 | 1,65 | 65  | 3,19 |
| 5642 | P2 | LY | 19 | 0,57 | 55  | 1,65 |
| 5681 | P2 | LY | 24 | 1,43 | 83  | 2,29 |
| 5706 | P2 | LY | 30 | 0,96 | 88  | 3,01 |
| 5722 | P2 | LY | 15 | 1,33 | 78  | 3,32 |
| 5724 | P2 | LY | 20 | 1,47 | 42  | 2,96 |
| 5732 | P2 | LY | 17 | 1,27 | 48  | 2,93 |
| 5754 | P2 | LY | 20 | 2,00 | 90  | 3,11 |
| 1624 | P3 | C  | 14 | 0,37 | 51  | 2,14 |
| 3157 | P3 | C  | 4  | 0,95 | 74  | 2,53 |
| 3651 | P3 | C  | 4  | 0,01 | 40  | 2,45 |
| 41-5 | P3 | C  | 16 | 0,61 |     |      |
| 4601 | P3 | C  | 3  | 0,01 | 27  | 1,27 |
| 5657 | P3 | C  | 10 | 1,44 | 62  | 1,74 |
| 5683 | P3 | C  | 4  | 0,34 | 58  | 2,46 |
| 5689 | P3 | C  | 4  | 0,03 | 40  | 1,44 |
| 5693 | P3 | C  | 3  | 0,10 | 70  | 2,89 |
| 5739 | P3 | C  | 11 | 0,56 | 40  | 2,17 |
| 5741 | P3 | C  | 11 | 0,24 | 98  | 3,01 |
| 2158 | P3 | LY | 14 | 0,31 | 28  | 0,98 |
| 2168 | P3 | LY | 14 | 1,17 | 51  | 2,16 |
| 2635 | P3 | LY | 12 | 1,10 | 64  | 2,76 |
| 3650 | P3 | LY | 9  | 0,07 | 52  | 2,19 |
| 4160 | P3 | LY | 3  | 0,01 | 36  | 2,02 |
| 4167 | P3 | LY | 4  | 0,01 | 46  | 1,88 |
| 4600 | P3 | LY | 6  | 0,63 | 76  | 3,46 |
| 5607 | P3 | LY | 4  | 0,71 | 36  | 2,00 |
| 5618 | P3 | LY | 3  | 0,01 | 70  | 2,94 |
| 5681 | P3 | LY | 1  | 0,00 | 84  | 3,21 |
| 5706 | P3 | LY | 12 | 1,22 | 85  | 2,35 |
| 5722 | P3 | LY | 5  | 0,25 | 49  | 2,81 |
| 5724 | P3 | LY | 9  | 0,14 | 31  | 1,90 |

|      |    |    |    |      |    |      |
|------|----|----|----|------|----|------|
| 5732 | P3 | LY | 12 | 1,19 | 40 | 1,53 |
| 5754 | P3 | LY | 6  | 0,04 | 46 | 2,27 |
| 5690 | P1 | C  |    |      | 64 | 2,62 |
| 5693 | P2 | C  |    |      | 29 | 1,79 |
| 4168 | P2 | LY |    |      | 58 | 2,98 |
| 2151 | P3 | C  |    |      | 65 | 2,92 |
| 4154 | P3 | C  |    |      | 23 | 2,29 |
| 4155 | P3 | C  |    |      | 33 | 2,77 |
| 4172 | P3 | C  |    |      | 59 | 1,82 |
| 4624 | P3 | C  |    |      | 52 | 2,11 |
| 5611 | P3 | C  |    |      | 36 | 2,46 |
| 5617 | P3 | C  |    |      | 31 | 1,17 |
| 5690 | P3 | C  |    |      | 33 | 2,47 |
| 5702 | P3 | C  |    |      | 47 | 2,57 |
| 3180 | P3 | LY |    |      | 25 | 1,47 |
| 4168 | P3 | LY |    |      | 44 | 2,29 |
| 5635 | P3 | LY |    |      | 17 | 0,90 |
| 5638 | P3 | LY |    |      | 58 | 2,81 |
| 5642 | P3 | LY |    |      | 36 | 1,68 |

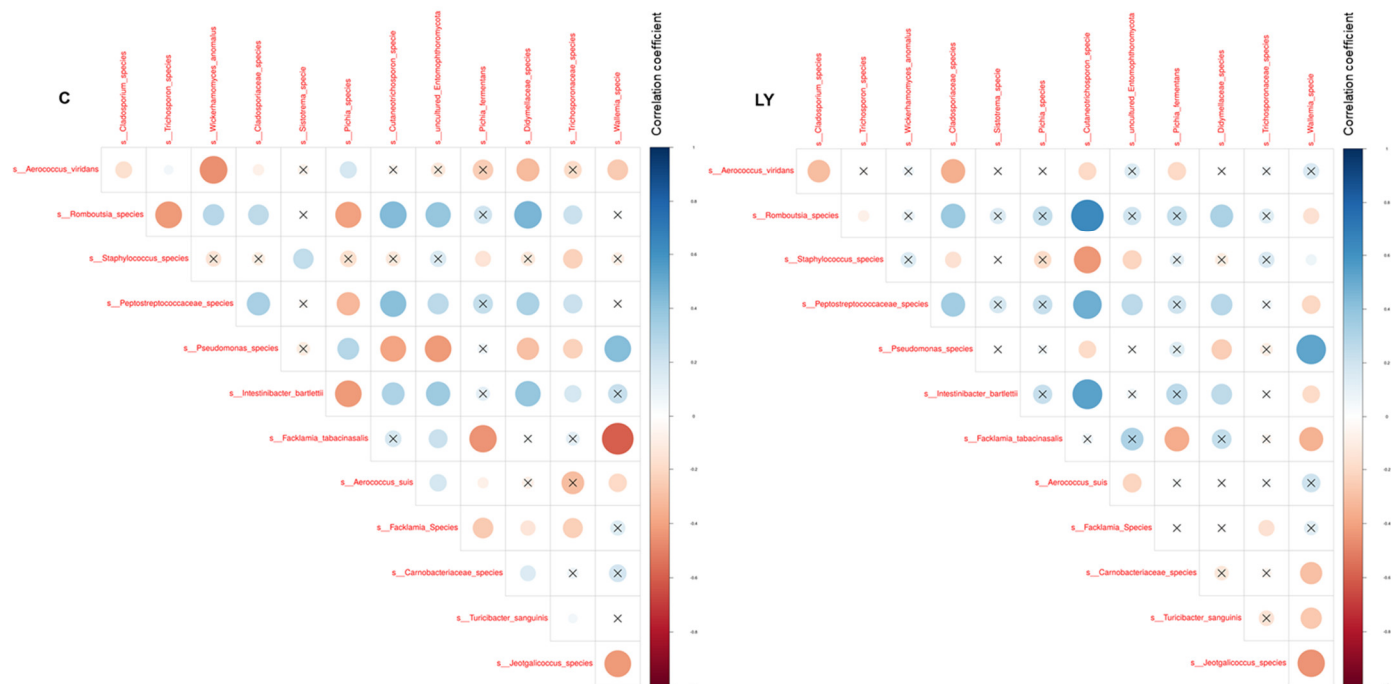

**Figure S1.** Correlogram of bacterial and fungal taxa with more than 1% of abundance in teat suspensions from the C and LY groups. Color intensity and the size of the circle are proportional to the **correlation coefficients**: blue color = positive correlations; red color = negative correlations. Crosses (x) indicate insignificant correlations (p-value > 0.05).
